# Supplementary material for: What to do about hepatocellular carcinoma: Recommendations for health authorities from the International Liver Cancer Association
Source: PubMed Central journal article supplement (PMC9638834; doi:10.1016/j.jhepr.2022.100578), 2022-09-08
Supplement: mmc1.pdf [file mmc1.pdf]

# What to do about hepatocellular carcinoma: Recommendations for health authorities from the International Liver Cancer Association

Manon Allaire, Jordi Bruix, Marko Korenjak, Sarah Manes, Zorana Maravic, Helen Reeves, Riad Salem, Bruno Sangro, Morris Sherman

## Table of contents

|               |   |
|---------------|---|
| Fig. S1.....  | 2 |
| Fig. S2.....  | 3 |
| Table S1..... | 4 |
| Table S2..... | 5 |
| Table S3..... | 6 |
| Table S4..... | 7 |
| Table S5..... | 8 |

**Fig. S1. Algorithm for the investigation of a liver mass found on surveillance. This algorithm is probably only feasible in high and middles resource regions (adapted from (59))**

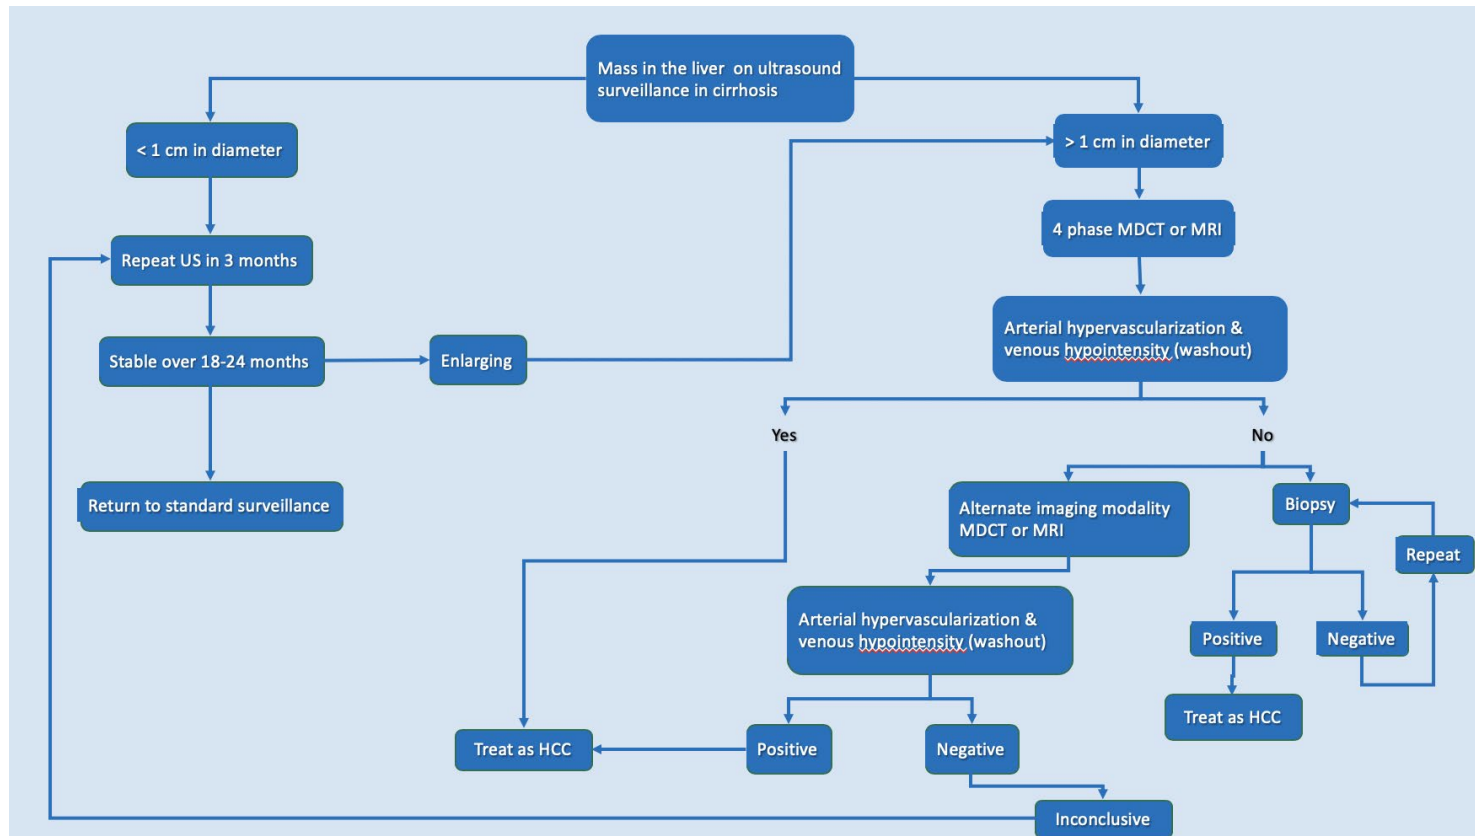

HCC – hepatocellular carcinoma

US – ultrasound

MDCT – multidetector computed tomography

MRI – magnetic resonance imaging

**Fig. S2. The BCLC Staging system and suggested treatment options (Adapted from (61))**

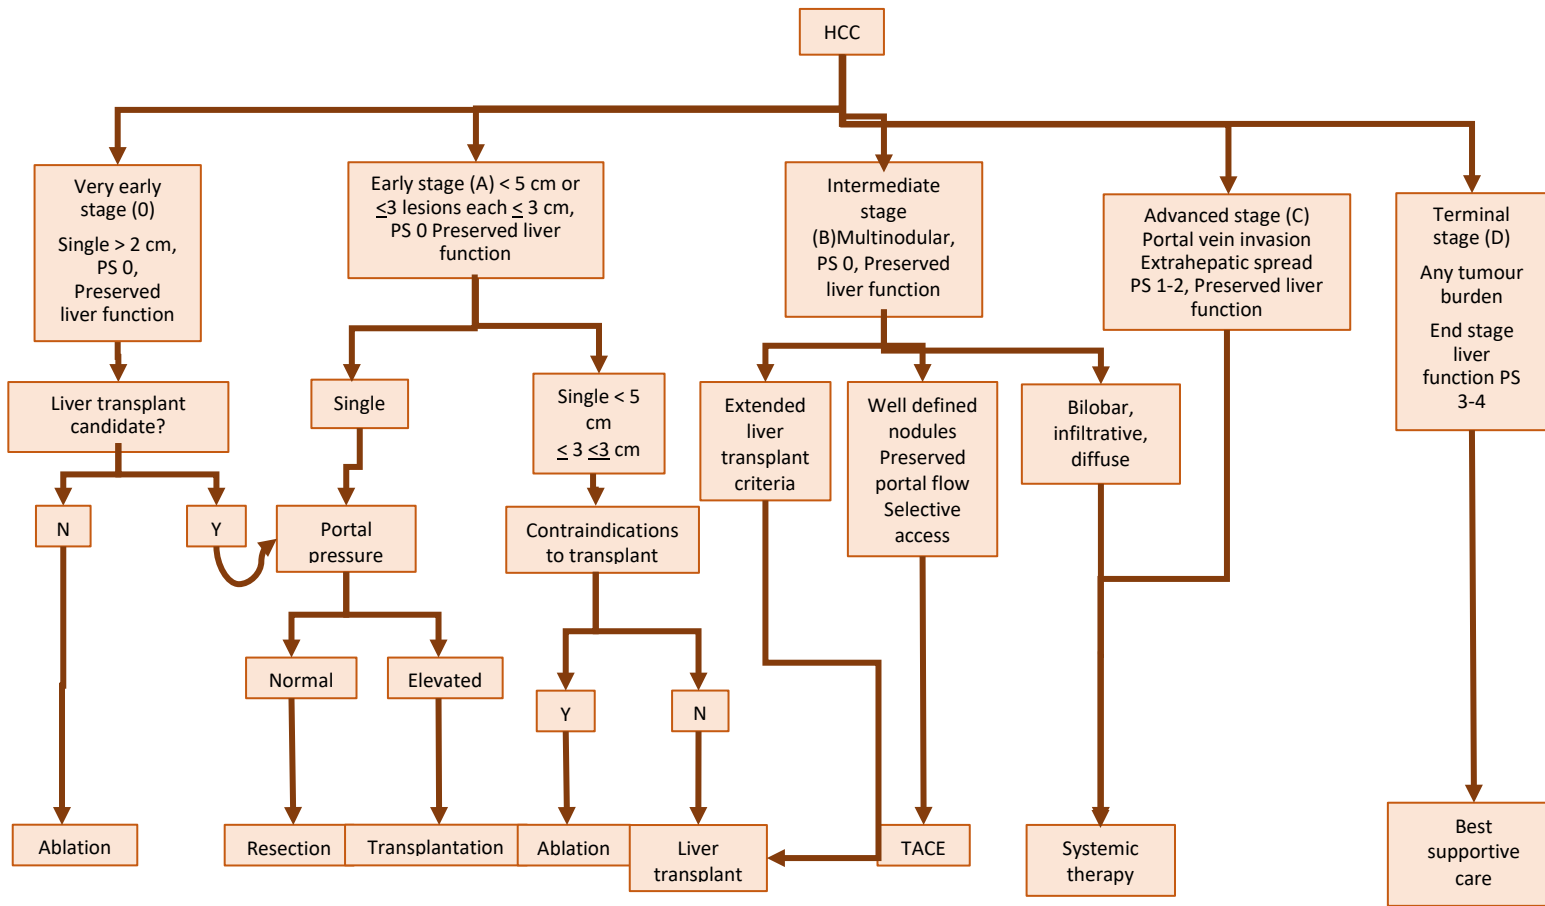

HCC – hepatocellular carcinoma  
PS – performance score

**Table S1. Incidence of hepatocellular carcinoma (6)**

| <b>Region</b>               | <b>Incidence/100,000</b> |
|-----------------------------|--------------------------|
| Global                      | 12.8                     |
| Asia Pacific high income    | 26.4                     |
| East Asia                   | 24.3                     |
| Western sub-Saharan Africa  | 16.9                     |
| South East Asia             | 13.9                     |
| Central sub-Saharan Africa  | 16.9                     |
| Oceania                     | 10.8                     |
| East sub-Saharan Africa     | 10.3                     |
| Southern sub-Saharan Africa | 8.6                      |
| Western Europe              | 9.0                      |

**Table S2. Epidemiology of chronic hepatitis B (9)**

| <b>WHO* region</b>           | <b>Best estimate of prevalence<br/>(% infected)</b> | <b>Best estimate of number of infected<br/>(millions)</b> |
|------------------------------|-----------------------------------------------------|-----------------------------------------------------------|
| African region               | 6.1                                                 | 60                                                        |
| Region of the Americas       | 0.7                                                 | 7                                                         |
| Eastern Mediterranean region | 3.3                                                 | 21                                                        |
| European region              | 1.6                                                 | 15                                                        |
| South East Asia region       | 2.0                                                 | 39                                                        |
| Western Pacific Region       | 6.2                                                 | 115                                                       |

\*World Health Organization

**Table S3. Epidemiology of chronic hepatitis C (9)**

| <b>WHO* region</b>           | <b>Best estimate of Incidence<br/>/100,000</b> | <b>Best estimate of number of<br/>infected (thousand)</b> |
|------------------------------|------------------------------------------------|-----------------------------------------------------------|
| African region               | 31                                             | 309                                                       |
| Region of the Americas       | 6.4                                            | 63                                                        |
| Eastern Mediterranean region | 62.5                                           | 409                                                       |
| European region              | 61.8                                           | 565                                                       |
| South East Asia region       | 14.8                                           | 287                                                       |
| Western pacific region       | 2.0                                            | 111                                                       |
| Total                        | 23.7                                           | 1751                                                      |

\*World Health Organization

**Table S4. Non-invasive blood test panels for fibrosis (25–31)**

| <b>Test panel</b>         | <b>Component blood tests</b>                        |
|---------------------------|-----------------------------------------------------|
| APRI (25)                 | AST, platelets                                      |
| Fib-4 (25)                | Age AST, ALT, platelets                             |
| Fibrotest (26)            | Age, gender, bilirubin, GGT, $\alpha$ 2M, Apo-A1    |
| Hepascore (27)            | Age, gender, bilirubin, GGT, $\alpha$ 2M            |
| Fibrometer (28)           | Age, AST, platelets, prothrombin index, urea        |
| Forns index (29)          | Age GGT, platelets, prothrombin, cholesterol        |
| ELF panel(30)             | Age Hyaluronic acid, TIMP-1, PNPIII                 |
| NAFLD fibrosis score (31) | Age BMI, diabetes, ASL/ALT, platelet count, albumin |

APRI - AST to platelet ratio index; NAFLD – nonalcoholic fatty liver disease; ELF – Enhanced Liver Fibrosis  
AST – aspartate aminotransferase. ALT alanine aminotransferase, GGT- gamma glutamyl transferase,  
 $\alpha$ 2M – alpha 2 macroglobulin, TIMP-1 – tissue inhibitor of metaloproteinase-1,  
PNPII – N-terminal procollagen peptide 3, BMI- basal metabolic index

**Table S5. Scores to assess HCC risk**

| <b>Risk Score</b>           | <b>Population</b>                                         | <b>Components</b>                                                                            |
|-----------------------------|-----------------------------------------------------------|----------------------------------------------------------------------------------------------|
| Reach B (34)                | Asian hepatitis B carriers                                | Age, ALT, HBeAg+/-, gender, HBV DNA                                                          |
| Reach BII (42)              | Asian hepatitis B carriers                                | Age, ALT, HBeAg+/-, gender, HBsAg concentration                                              |
| CU-HCC (43)                 | Asian hepatitis B carriers                                | Age, albumin, HBV DNA, cirrhosis+/-                                                          |
| GAG-HCC (35)                | Asian hepatitis B carriers                                | Age, gender, HBV DNA, cirrhosis+/-, core promoter mutation                                   |
| PAGE B (36)                 | Caucasian hepatitis B carriers                            | Age, gender, platelets                                                                       |
| CAGE B (44)<br>SAGE B       | Caucasian hepatitis B carriers after 5 years of follow-up | Age, baseline cirrhosis+/-, LSM <sup>1</sup><br>Age, LSM (baseline cirrhosis status unknown) |
| Toronto (37)                | Cirrhosis of various etiologies                           | Age, etiology, gender, APRI score                                                            |
| Adress (39)                 | Hepatitis C cirrhosis                                     | Age, diabetes+/-, gender, Child-Pugh score <sup>2</sup> , Race                               |
| HALT C Trial Group (40)     | Hepatitis C cirrhosis                                     | Age, Race, ALP, esophageal varices+/-, ever smoked+/-, platelets                             |
| ANRS CO12 CirVir Study (41) | Hepatitis C                                               | Age, alcohol excess+/-, platelets, GGT, lack of SVR <sup>3</sup>                             |
| aMAP (38)                   | All liver disease                                         | Age gender, ALBI score <sup>4</sup> , platelets                                              |
| PLAN B (45)                 | Chronic hepatitis B                                       | Cirrhosis, age, platelets, antivirals, sex, ALT, HBV DBA, albumin, bilirubin, HBeAg          |

<sup>1</sup>LSM-liver stiffness measurement.

<sup>2</sup>Child-Pugh score – used to assess liver function.

<sup>3</sup>SVR – sustained virological response (cured hepatitis C). <sup>4</sup>ALBI score – used to assess liver function.
